# Supplementary material for: Epstein–Barr virus transcription factor Zta acts through distal regulatory elements to directly control cellular gene expression
Source: Oxford University Press journal article supplement (doi:10.1093/nar/gkv212), 2015-03-16
Supplement: gkv212_Supplementary_Data.zip [file gkv212_Supplementary_Data.zip]

**Supplementary information for:**

**Epstein Barr virus transcription factor Zta acts through distal regulatory elements to directly control cellular gene expression**

Sharada Ramasubramanyan<sup>1</sup>, Kay Osborn<sup>1</sup>, Rajaei Al-Mohammad<sup>1</sup>, Ijuel Barak Naranjo Perez-Fernandez<sup>1</sup>, Jianmin Zuo<sup>2</sup>, Nicolae Balan<sup>1</sup>, Anja Godfrey<sup>1</sup>, Harshil Patel<sup>3</sup>, Gordon Peters<sup>3</sup>, Martin Rowe<sup>2</sup>, Richard G. Jenner<sup>4</sup>, Alison J. Sinclair<sup>1\*</sup>.

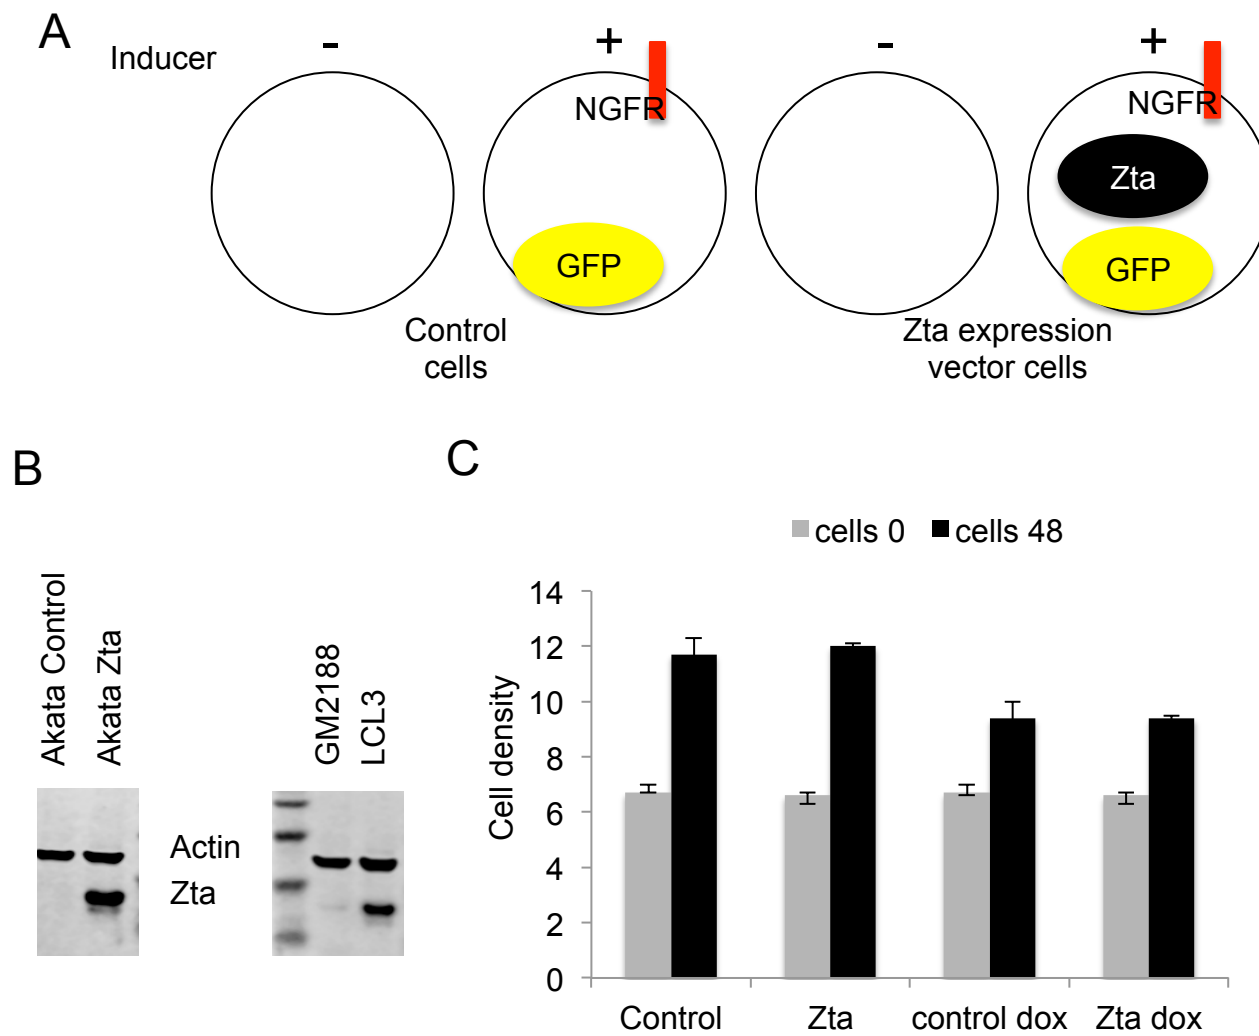

Supporting Figure S1. Generation and characteristics of doxycycline-inducible Akata-Zta and control cells.

- Expression vectors for Zta and control were introduced into Akata cells and cells expressing the selectable marker CD2 were selected. Doxycycline was added to induced expression of the bi directional promoter and Zta, NGFR and GFP were expressed.
- Zta and actin proteins were detected by western blot analysis and compared to a tightly latent (GM2188) and a lytic LCL (LCL#3).
- The viability of the Akata control and Akata Zta cells was assessed using a Trypan Blue exclusion assay after 48 hours growth in the presence or absence of doxycycline.

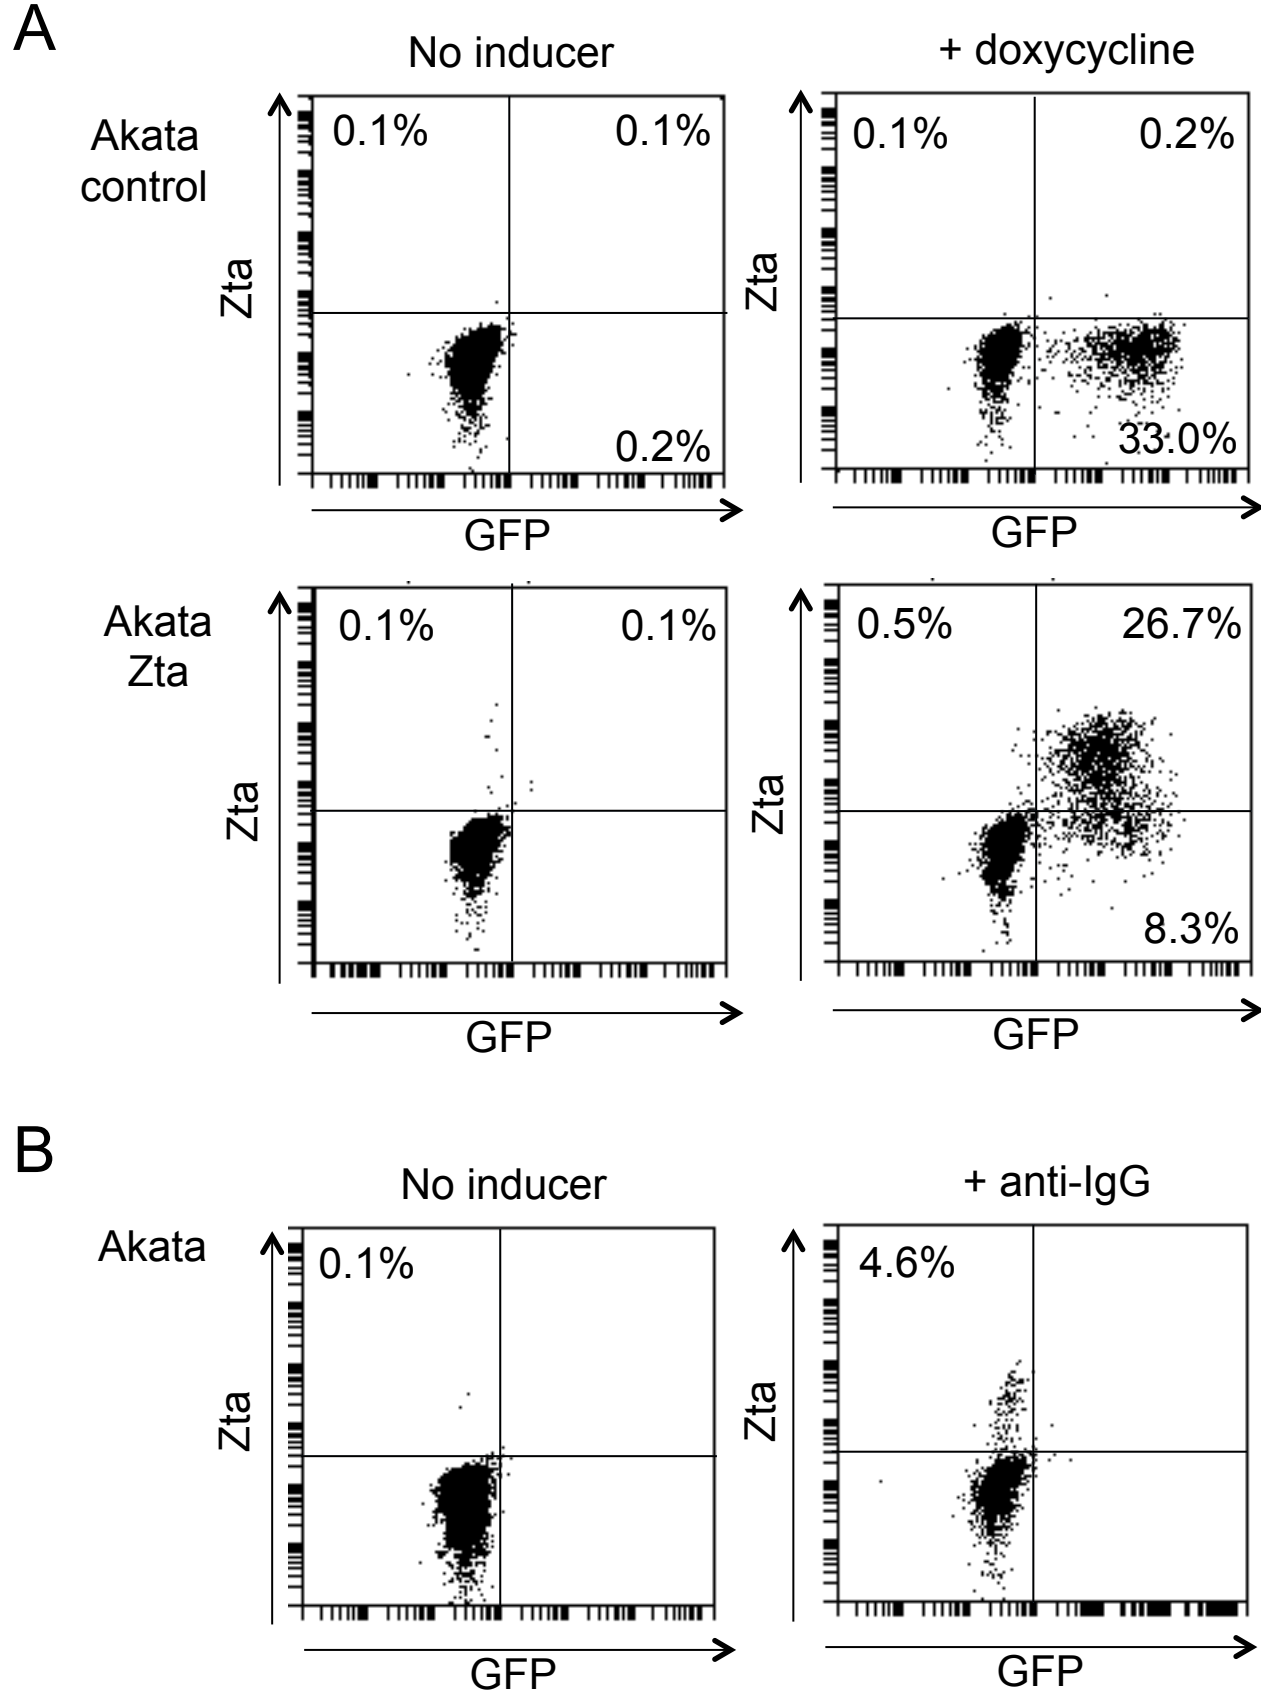

Supporting Figure S2. Comparison of Zta expression after doxycycline induction and BCR ligation.

A. Akata control and Akata Zta cells were exposed or not to doxycycline. The expression of Zta and GFP were detected by multiparameter FACS after intracellular staining for Zta expression.

B. Akata cells were stimulated with and without anti-IgG and the same analysis undertaken.

A

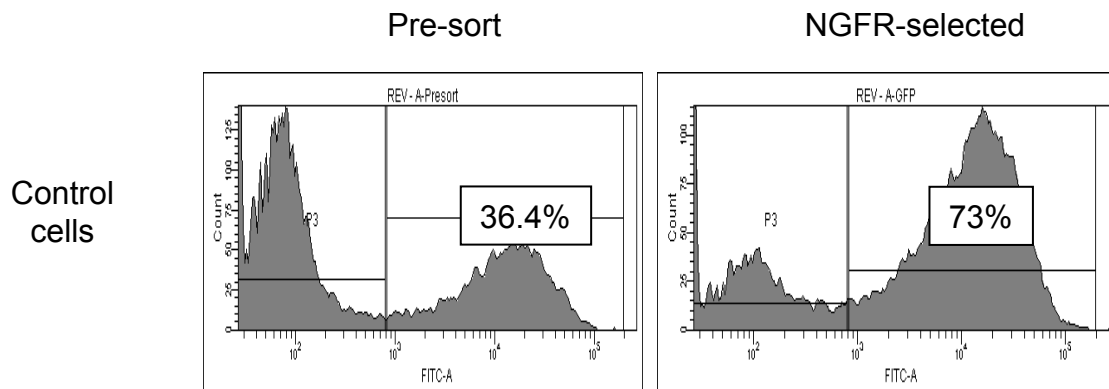

B

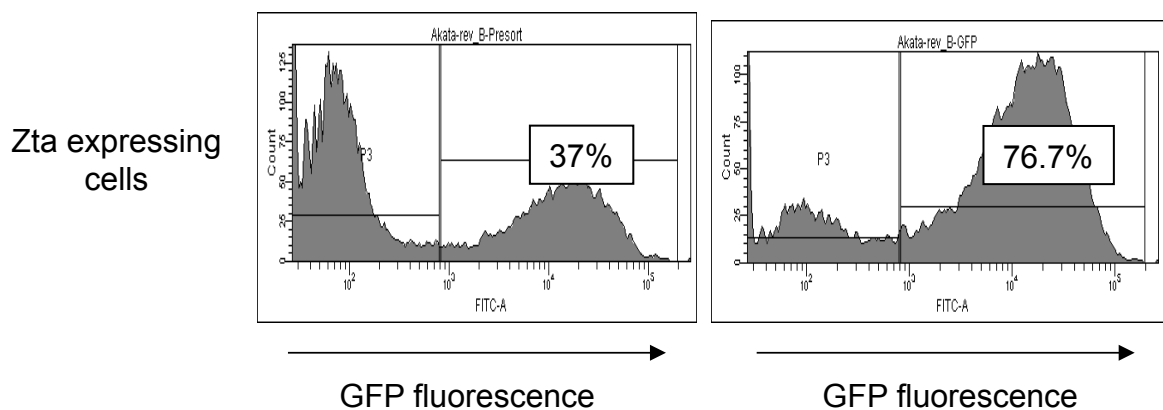

Supporting Figure S3. Enrichment of doxycycline induced Akata-Zta BL cells.

Cells were induced with doxycycline and analysed for GFP expression by FACS analysis before and after enrichment for NGFR expression.

A. Akata control cells

B. Akata Zta cells.

C. The % of GFP positive cells are shown.

A

CGCCCGGCGGATCCGTCTGCAGAGGCAT**TGAGCCAT**GCAC**TTAGCAA**ATTAT**TGTGTAAGT**ACTG  
**TGAGCAAGACGTGTGCAATAAGCTTGAGCCATGGCTGTGTCAATCGATGTGCAATGCACATGTG**  
TCAATGCAT**TGAGTCATCATTTGACTAAT**GCTGAT**TGTGTCAGGATATGTGTCTTTAGCTGAGCAA**  
CCTAG**TGGCACAGCTACCTGAGTAATAGAGTTGCAATACGTGAGCAA**CTAATCT**TGTGTCATAC**  
AG**TGAGCCA**ACTAGTATGTCGACGCGGCCG

B

GGATCCGGGCGAATCTCCGAGCAGAGAGAAGAAATTGAGTGTGTGACAGTGTGAATGGATGTG  
ACTATAGGTGAGCAACAGTCGGTGACAATGTGCACATCTGGTATTTCCCTGTGTGAGAGCAAAA  
CTACAGGACTCAGTGAGTGGTTTTCTGTGGTTTGCAC**TTGTGTATCTGGGTGTATGGGAGTGTG**  
TAGCCCTGCTGACTGTGTAGATATGAATGTGTGTGCAGTTGTGAGTCTTGCATGTGGTCATCT  
ATGTGAAACAATGCCTGTATAAGTACCCATGGATGTGCACGGTTTTGCCTCTAGCCGTGCATT  
TCTGGTTCTGTGTGTGTGTGT**TTCTGGGACATTCTTCAAGTCCACA**ACTCTGAGGGTATCACT  
GTGAGAGCAGGGGTCCTAGCTCTACCCATTTGTGTGTGTGTGGAGATGTGTAAGTCTATGTAG  
ACAAAAGTGTGTGTCATTTACTGTGTTTGGGGTGTGAACACCTATGTGATGTGTTTGCACAAC  
TGCACGTGTTTTGTTCTGTGTGTGTGATCGTGTGTTCAAATAAGTCATCTTGTCTAGTCATCA  
GGTGCCTGCACAGACAAAGGTGAAAGGTGTCTGCCTGTTGAGATCTGTGGATAGGGTGTATAT  
ATGGACATCTCAGCCTGTCTACGTGTGTATCTGTCTCTGTCCTCACGGCAAAAGAGAGGTCGA  
C

C

CTTTCTGTCTTCACCAAATTCAGTCCACAGTAAGGAAGTGAAATTAATTT**CAGAGGTGTGGGG**  
AGGGCTTAAGGGAGTGTGGTAAATTAGAGGGTGTTCAGAAACAGAAATCTGACCGCTTGGGG  
CCACCTTGCAGGGAGAGTTTTTTTTGATGATCCCTCACTTGT**TTCTTTGCATGTTGGCTTAGCT**  
TGGCGGGCTCCCAACTGGTGACTGGTTAGTGATGAGGCTAGTGATGAGGCTGTGTGCTTCTGA  
GCTGGGCATCCGAA

D

GGATAATGGAACCCTATGGATACCTACCTCTAGGCTCCACCCACTAGGTATATCGGGGCGGAG  
CCCAATCCTCCCCCTCCTGGTTCAACCCTATGGAGGGGACCCTCCTGAGGCTCCGCCTACCCC  
AAATCTCGCGGACCTCTAGCCCCCTCCTCCTCTCGTTATCCCAATAGAATAACCTCCAGGTACC  
ACCCACCTGGCCCCCTTTCCTTAATGAAACCCAACGGGCTAAAAACCCCTTTCCTGAATTAACCA  
ATAAGAAGCCCCCACTCCCCCCCTTTACCTTAAAGTACCCCTTTGAGACCCCCAAAAGAGGATA  
AAAGAAGGCGAGCCGGCCCGGCTCGCCAGCGTCGTCCAGACGCTCGGGGGGTGC

E

CGCCCGGCGGATCCGTCTGCAGAGGCAT**TACTCAT**GCAC**TGACTCA**ATTAT**TACTCAGT**ACTG  
**TTACTCAGACGTTACTCATAAGCTGACACATGGCTGTGTCTATCGATGTGTCTTGCACATGTG**  
TCAATGCAT**TGTGTCTTCATTTGTGTCTT**GCTGAT**TGTGTCTGGATATGTGTCTTTAGCTGTGCAA**  
CCTAG**TGTGTCT**GCTACC**ACGCACATAGATGTGCAATACGTGACACA**CTAATCT**TGTGTCTTAC**  
AG**TGACACA**ACTAGTATGTCGACGCGGCCG

Figure S4. DNA sequence of promoters.

- A. The DNA sequence of the tandem ZRE elements is shown with each of the non-CpG ZREs shown in bold.
- B. The DNA sequence of the Zta binding sites associated with the FOSB gene are shown (Chr19:45954888-45955223; 45962338-45962553; 45962727-45962858, hg19).
- C. The DNA sequence surrounding the *CIITA* promoter (-212 to +54) is shown.
- D. The DNA sequence surrounding the viral *BHLF1* promoter is shown with the location of the mutated ZREs underlined. This includes nucleotides 52760-53128 from B95-8 virus sequence.
- E. The DNA sequence of the ZREs within seven Zta binding sites associated with the RASA3 3' region are shown (bold).
